# Supplementary material for: Salt wasting syndrome in brain trauma patients: a pathophysiologic approach using sodium balance and urinary biochemical analysis
Source: Springer Nature journal article supplement (doi:10.1186/s12883-020-01771-8), 2020-05-16
Supplement: MOESM1 [file 17989144]

**Supplementary Data 1.** Daily sodium intake conversion table

| Unit per day                              | Na (mmol/unit) |
|-------------------------------------------|----------------|
| <b>Fluid intakes</b>                      |                |
| Non-balanced Crystalloid Solutions        |                |
| - NaCL 0,9% (per ml)                      | 0.15           |
| - NaCL 10% (per ml)                       | 1.71           |
| - NaCL 3%                                 | 0.51           |
| - PG5 (per ml)                            | 0.07           |
| Balanced Crystalloid Solutions            |                |
| - Isofundine (per ml)                     | 0.15           |
| - Ringer lactate (per ml)                 | 0.13           |
| Bicarbonates                              |                |
| - Bicarbonates 1,4% (per ml)              | 0.17           |
| - Bicarbonates 4,2% (per ml)              | 0.50           |
| Albumin (4 or 20%, per ml)                | 0.15           |
| Parenteral Nutrition (per ml)             | 0.04           |
| Enteral Nutrition (per ml)                | 0.04           |
| <b>Antibiotic agents</b>                  |                |
| - Amoxicillin ± Clavulanate (per 2g unit) | 5.48           |
| - Cefazolin (per 2g unit)                 | 4.40           |
| - Cefotaxime (per 2g unit)                | 4.20           |
| - Ceftriaxone (per 2g unit)               | 7.20           |
| - Ceftazidime (per 2g unit)               | 4.50           |
| - Ciprofloxacin (per 200mg/100ml unit)    | 30.80          |
| - Levofloxacin (per 500mg/100ml unit)     | 15.80          |
| - Linezolid (per 600mg/300ml unit)        | 4.95           |
| - Meropenem (per 2g unit)                 | 7.80           |
| - Metronidazole (per 500mg/100ml unit)    | 14.76          |
| - Piperacillin ± Tazobactam(per 4g unit)  | 11.35          |
| <b>Other treatments</b>                   |                |
| - Levetiracetam (per 500 mg unit)         | 0.80           |
| - Paracetamol (per 1g/100ml unit)         | 0.17           |
| - Phosphoneuros (per 100 drops)           | 15.52          |
| - Thiopental (per 1g unit)                | 4.60           |
